# Supplementary material
Source: Copernicus journal article supplement (doi:10.5194/egqsj-12-5-1962)
Supplement: Supplementary file 1 [file egqsj-12-5-1962-supplement.pdf]

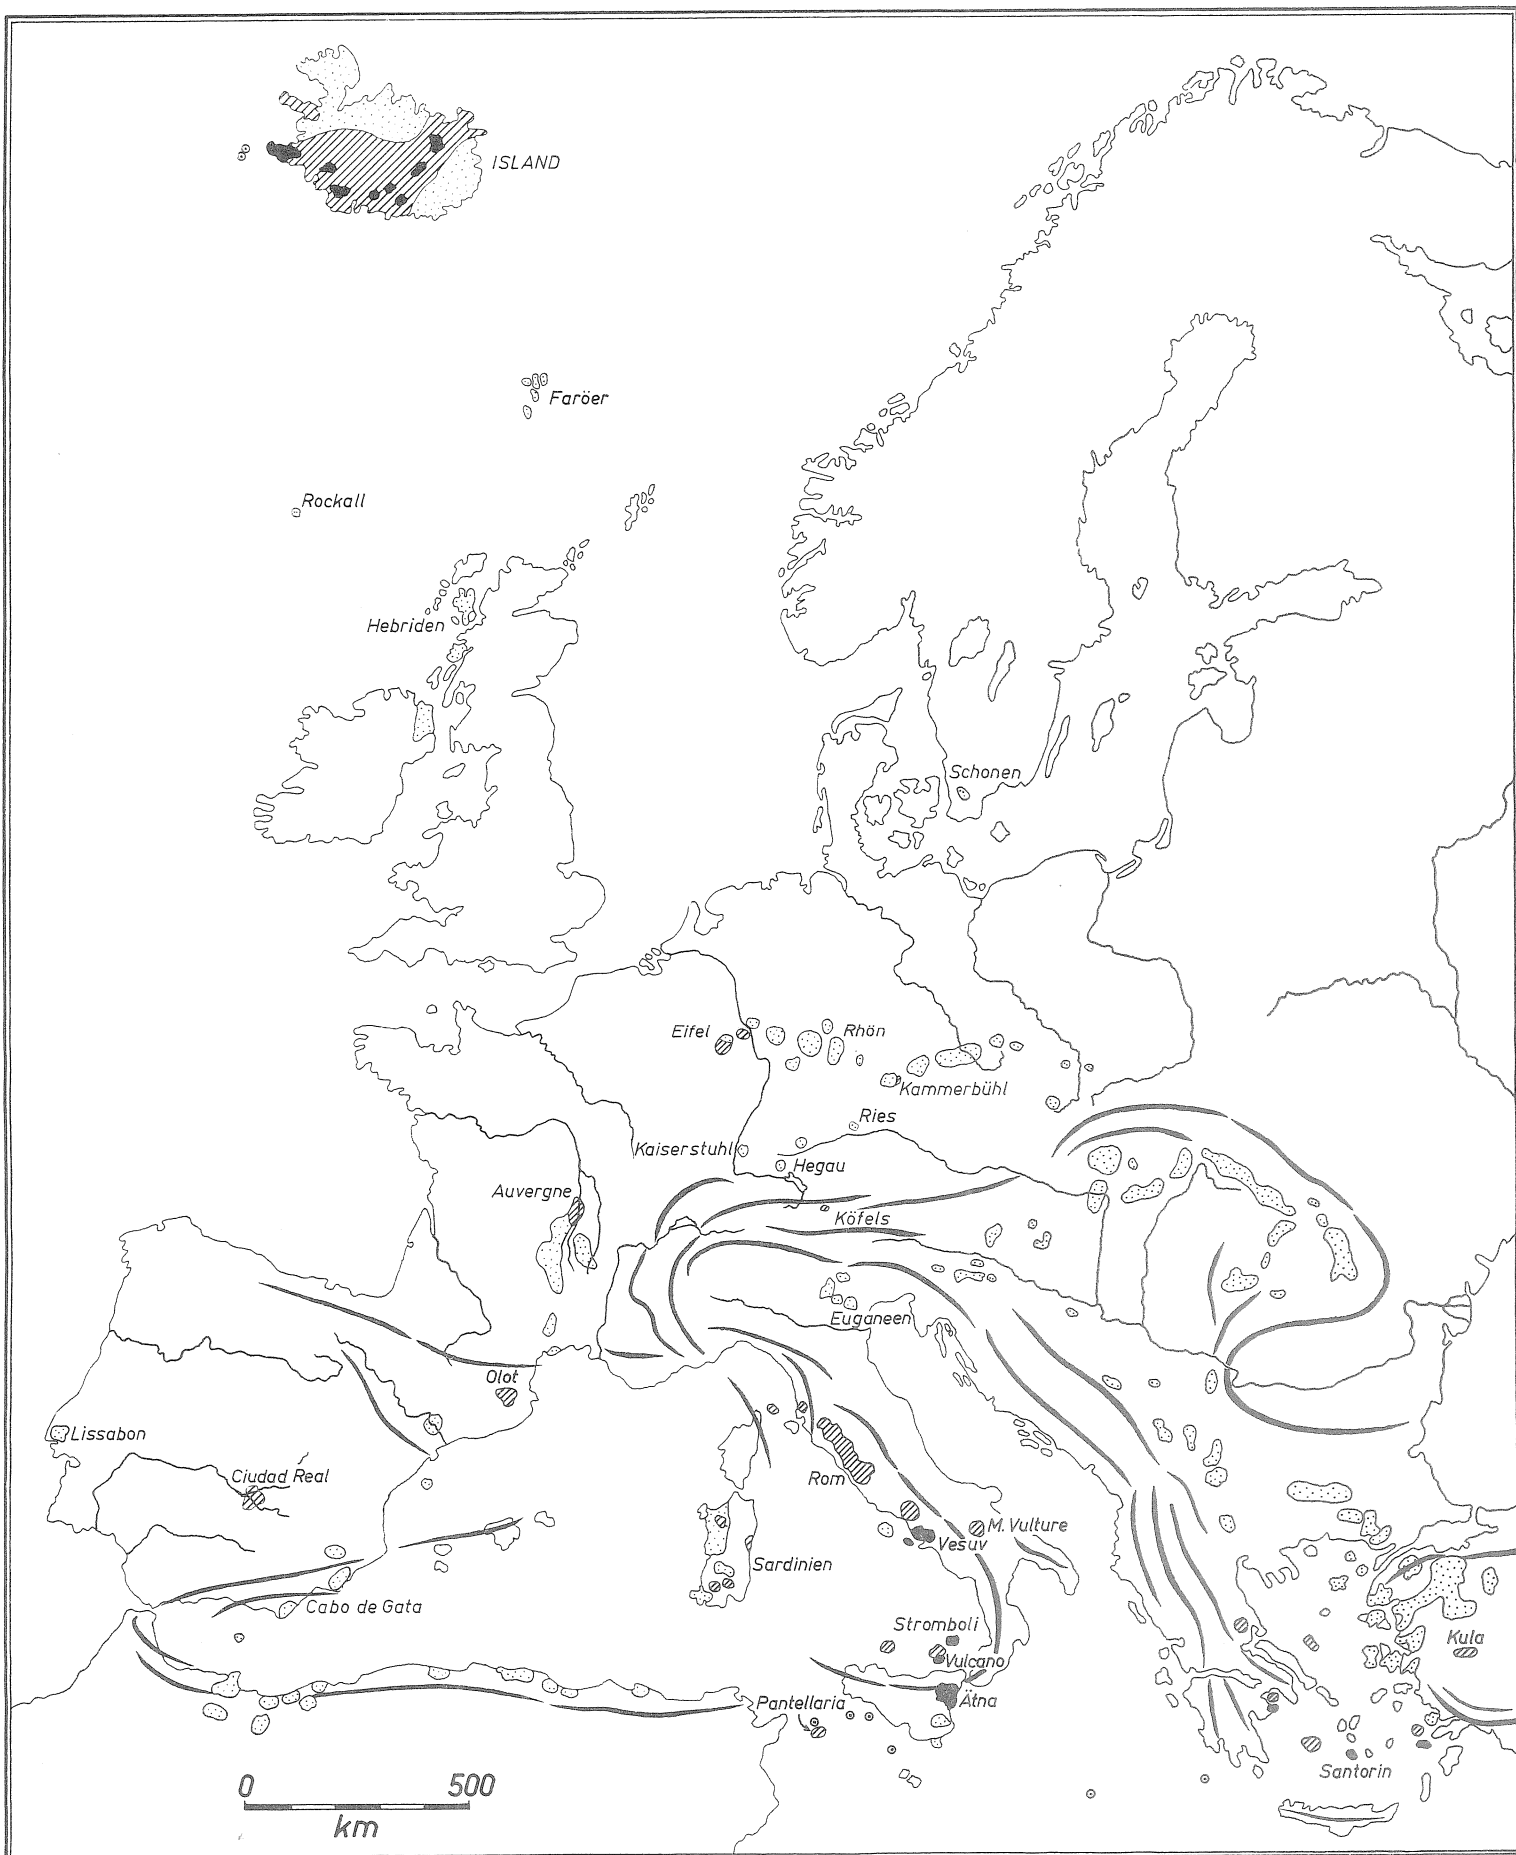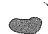

Eruptionen in historischer Zeit

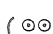

(○○ Submarine Ausbrüche)

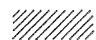Pleistozän, z.T. etwas älter,  
z.T. Holozän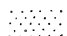

Tertiär (z.T. ins Quartär reichend)

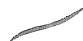

Junge Faltengebirge

Die quartären und tertiären Vulkangebiete Europas  
 Nach der Internationalen geol. Karte von Europa (1 : 1 500 000, herausgegeben von der Preuß.  
 Geol. Landesanst. Berlin) und andern Quellen zusammengestellt.
